# Supplementary material for: Blocking Store-Operated Ca2+ Entry to Protect HL-1 Cardiomyocytes from Epirubicin-Induced Cardiotoxicity
Source: MDPI journal article supplement (doi:10.3390/cells12050723), 2023-02-24
Supplement: s1 [file s1]

## Supplementary Materials

### RNA-seq Data Analysis

Dataset: GSE217421 (<https://www.ncbi.nlm.nih.gov/geo/query/acc.cgi?acc=GSE217421>)

Human skin tissue, induced pluripotent stem cell, cardiac myocytes

Treatment condition: EPI (Epirubicin), 2uM for 48 hours.

The primary question is whether the listed genes are differentially expressed under Epirubicin (EPI) treatment compared to control (Table S1). Total 17 EPI samples and 56 control samples covering 5 different cell lines were used with each cell line having different number of replicates as shown in Table S2. Table S3 shows all the control cell lines and replicate numbers, except two not in the data set.

| Table S1. Gene of interest comparison between EPI and control |         |         |         |             |          |
|---------------------------------------------------------------|---------|---------|---------|-------------|----------|
| Geneid                                                        | CTR     | EPI     | CTR-EPI | p-values    | FC_EvsC  |
| ATP2A1                                                        | 6.3521  | 6.859   | -0.5068 | 0.10356413  | 1.420923 |
| ATP2A2                                                        | 15.3132 | 15.0526 | 0.2606  | 0.177814885 | 0.83473  |
| ATP2A3                                                        | 7.8859  | 8.1625  | -0.2766 | 0.449168353 | 1.211341 |
| ITPR1                                                         | 8.8424  | 8.3034  | 0.539   | 0.026119121 | 0.68823  |
| ITPR2                                                         | 8.4596  | 7.6078  | 0.8518  | 0.017024689 | 0.554093 |
| ITPR3                                                         | 7.5063  | 7.342   | 0.1643  | 0.42783548  | 0.892387 |
| NFAT5                                                         | 11.2428 | 9.9487  | 1.2941  | 1.88374E-08 | 0.40779  |
| NFATC1                                                        | 6.8247  | 6.4073  | 0.4174  | 0.137186378 | 0.748771 |
| NFATC2                                                        | 7.8592  | 6.886   | 0.9732  | 0.000154061 | 0.509376 |
| NFATC3                                                        | 10.1062 | 8.6265  | 1.4797  | 1.634E-10   | 0.358567 |
| NFATC4                                                        | 8.7542  | 9.1115  | -0.3573 | 0.313684958 | 1.281017 |
| NPPA                                                          | 14.3383 | 16.431  | -2.0927 | 2.92578E-07 | 4.265379 |
| NPPB                                                          | 12.5166 | 13.9646 | -1.448  | 0.002760477 | 2.728341 |
| ORAI1                                                         | 8.0194  | 6.3349  | 1.6845  | 8.47074E-07 | 0.311114 |
| ORAI2                                                         | 9.436   | 9.0708  | 0.3651  | 0.081642536 | 0.776409 |
| ORAI3                                                         | 8.3587  | 7.2943  | 1.0645  | 2.33991E-07 | 0.478151 |
| STIM1                                                         | 10.2425 | 9.548   | 0.6945  | 6.82055E-05 | 0.61794  |
| STIM2                                                         | 8.6229  | 7.5348  | 1.0881  | 1.67131E-06 | 0.470379 |
| TRPC1                                                         | 8.9364  | 8.7972  | 0.1392  | 0.413543553 | 0.908042 |
| TRPC2                                                         | 0.233   | 2.4592  | -2.2262 | 5E-13       | 4.679069 |
| TRPC3                                                         | 7.8435  | 7.0189  | 0.8246  | 9.81324E-05 | 0.564656 |
| TRPC4                                                         | 7.2956  | 4.8105  | 2.4852  | 6.3198E-09  | 0.178604 |
| TRPC5                                                         | 1.4794  | 0.6157  | 0.8638  | 0.016016663 | 0.549511 |
| TRPC6                                                         | 1.337   | 1.0743  | 0.2627  | 0.417846246 | 0.833533 |

| Table S2. Table of trt by cell-final used |              |              |              |              |              |        |
|-------------------------------------------|--------------|--------------|--------------|--------------|--------------|--------|
| trt                                       | Cell Line    |              |              |              |              |        |
|                                           | MSN01_03R_CM | MSN05_01R_CM | MSN06_07R_CM | MSN08_13R_CM | MSN09_04R_CM | Total  |
| CTRL                                      | 11           | 12           | 11           | 12           | 10           | 56     |
|                                           | 15.07        | 16.44        | 15.07        | 16.44        | 13.70        | 76.71  |
| EPI_                                      | 4            | 4            | 4            | 3            | 2            | 17     |
|                                           | 5.48         | 5.48         | 5.48         | 4.11         | 2.74         | 23.29  |
| Total                                     | 15           | 16           | 15           | 15           | 12           | 73     |
|                                           | 20.55        | 21.92        | 20.55        | 20.55        | 16.44        | 100.00 |

| Table S3. Table of State by Cell (all EPI and control samples) |              |              |              |              |              |              |        |
|----------------------------------------------------------------|--------------|--------------|--------------|--------------|--------------|--------------|--------|
|                                                                | Cell Line    |              |              |              |              |              |        |
|                                                                | MSN01-03R-CM | MSN02-04R-CM | MSN05-01R-CM | MSN06-07R-CM | MSN08-13R-CM | MSN09-04R-CM | Total  |
| CTRL                                                           | 12           | 5            | 12           | 11           | 12           | 11           | 63     |
|                                                                | 15.00        | 6.25         | 15.00        | 13.75        | 15.00        | 13.75        | 78.75  |
| EPI                                                            | 4            | 0            | 4            | 4            | 3            | 2            | 17     |
|                                                                | 5.00         | 0.00         | 5.00         | 5.00         | 3.75         | 2.50         | 21.25  |
| Total                                                          | 16           | 5            | 16           | 15           | 15           | 13           | 80     |
|                                                                | 20.00        | 6.25         | 20.00        | 18.75        | 18.75        | 16.25        | 100.00 |

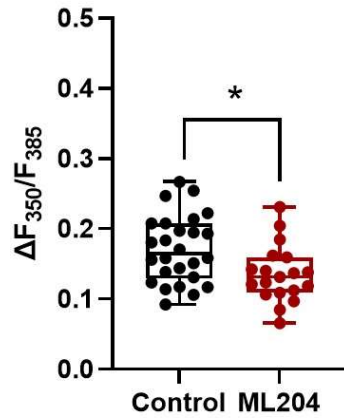

Figure S1. ML204 inhibited SOCE in HL-1 cells. HL-1 cells were treated with vehicle control or 10  $\mu$ M ML204 for 30min. SOCE was measured following the same protocol in text after complete depletion of SR/ER  $Ca^{2+}$  stores by TG. Mean  $\pm$  SD, \*:  $p < 0.05$ . (Based on t-test).

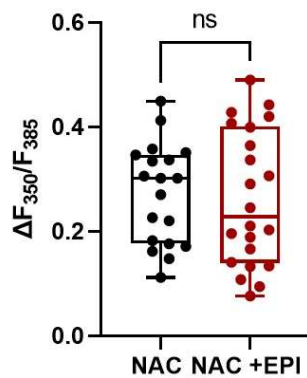

Figure S2. EPI failed to increase SOCE in HL-1 cells treated with ROS scavenger. HL-1 cells were incubated with 20 mM N-acetyl-l-cysteine (NAC), a ROS scavenger for 2 hours. Then the cells were either treated with vehicle control only (NAC group) or with 1  $\mu$ M EPI for 30min (NAC+EPI group). Mean  $\pm$  SD, (based on t-test).

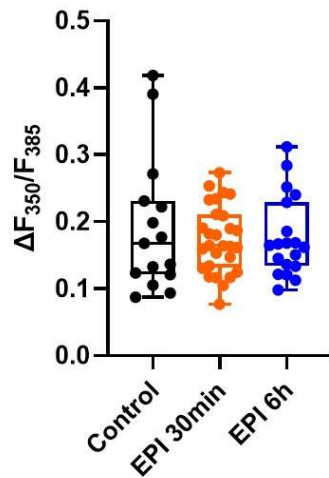

Figure S3. TG-sensitive SR/ER  $\text{Ca}^{2+}$  storage analysis in HL-1 cells. 10  $\mu\text{M}$  TG induced intracellular  $\text{Ca}^{2+}$  elevation in HL-1 cells, reflecting SR/ER  $\text{Ca}^{2+}$  stores. Cells were treated with vehicle only (control), 1  $\mu\text{M}$  EPI for 30min (EPI 30 min) or for 6h (EPI 6h). Mean  $\pm$  SD,  $n > 10$ . (based on One Way ANOVA). No significant differences among 3 groups.

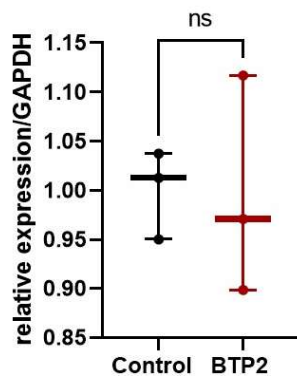

Figure S4. Orail expression is not affected by BTP2 treatment in HL-1 cells. Mean  $\pm$  SD,  $n = 3$ . (based on One Way ANOVA).
